1 **Atomic-level characterization of conformational transition and substrate binding of**  
2 **xCT transporter**

3

4 M. Sharma, A. C. Rohithaswa

5

6

7

8

9

10

11

12

13

14

15

16

17

18

19

20

21

22

23

24

25 **Keywords**

26 Human cystine-glutamate transporter, homology modeling, targeted molecular dynamics,  
27 substrates docking

28

29 **Abstract**

30 xCT is a component of heterodimeric amino acids transporter system Xc- that has been  
31 known to work at the cross-roads of maintaining neurological processes and regulating  
32 antioxidant defense. xCT is a sodium-independent amino acid antiporter, that imports L-  
33 cystine and exports L-glutamate in a 1:1 ratio. The transporter has 12 transmembrane  
34 domains with intracellular N- and C-termini, which can undergo various conformational  
35 changes while switching the ligand accessibilities from intracellular to extracellular site. In  
36 the present study, we generated two homology models of human xCT in two distinct  
37 conformations: inward facing occluded state and outward facing open state. We investigated  
38 the conformational transitions within these two states by employing series of targeted  
39 molecular dynamics simulations. Our results indicated the substrate translocation channel  
40 composed of transmembrane helices TMs 1, 3, 6, 8, and 10. Further, we analyzed the ligand  
41 binding within the intermediate conformations obtained from the transition simulations. We  
42 docked anionic L-cystine and L-glutamate within the cavities alone or in combination to  
43 assess the two distinct binding scenarios for xCT as antiporter. We also assessed the  
44 interactions between the ligand and xCT and observed that ligands bind to similar residues  
45 within the channel, and these residues are essential for substrate binding/permeation. In  
46 addition, we analyzed the correlations between ligand binding and conformational transition  
47 and observed conformations that are representatives for intermediate ligand bound states. The  
48 results presented in the study provide insights into the interplay of conformational transition  
49 and ligand binding as xCT goes from one probable conformation to another while  
50 transporting the ligand. And the data thus adds to the existing evidence of alternating access  
51 mechanism pertaining to the functioning of transporters.

52

53

54

55

## 56 **Introduction**

57 The cystine-glutamate transporter (xCT) is a component of heteromeric, sodium-independent  
58 amino acid transport (HAT) system, Xc<sup>-</sup> with high specificity for cystine and glutamate (1,  
59 2). The function of Xc<sup>-</sup> primarily connects neurotransmission and behavior with the  
60 antioxidant defense(3–5). System Xc<sup>-</sup> includes specific light chain transporter xCT (~40kDa)  
61 and heavy chain, 4F2hc (~80kDa) which are linked by a disulfide bridge(6, 7). In a functional  
62 dimer, 4F2hc is responsible for trafficking of the light chain and xCT is required for the  
63 transport activity of the dimer. Reconstitution studies on similar HAT system (SLC7A9)  
64 showed that light chains are fully functional in the absence of its corresponding heavy  
65 subunit(8). Expression of xCT on the cell membrane is essential for the uptake of cystine  
66 required for intracellular glutathione (GSH) synthesis and maintaining the intracellular redox  
67 balance(9). Extracellular glutamate acts as a competitive inhibitor for cystine uptake via  
68 system Xc<sup>-</sup>, indicating that xCT primarily imports anionic cystine and exports glutamate in  
69 1:1 ratio as an electroneutral antiporter exchange system for cystine/glutamate(10).  
70 Impairment of xCT results in disruption in glutamate homeostasis as observed in primary  
71 gliomas, resulting in elevated glutamate secretion and neuronal cell death(11–13).  
72 Dysfunction of xCT or decreased levels of mRNA expression of SLC7A11, gene associated  
73 with encoding xCT has been linked with various neurodegenerative disorders(5, 14, 15), such  
74 as schizophrenia(16), amyotrophic lateral sclerosis (ALS)(17), multiple sclerosis (MS)(18),  
75 and Parkinson's diseases(19). On the other hand, xCT is upregulated in various cancer cell  
76 lines under oxidative stress including pancreatic cancer(20), breast cancer (21, 22), bladder  
77 carcinoma cells (23), and lung tumor progression(24). Expression of xCT has also been  
78 proposed as a predictor of disease recurrence in patients with colorectal cancer(25). Enhanced  
79 biosynthesis of intracellular GSH via xCT protects cancer cells from drug-induced oxidative  
80 stress by mediating drug detoxification or inactivation(26–28). In addition, xCT has been  
81 identified as the predominant mediator of Kaposi's sarcoma-associated herpesvirus (KSHV)  
82 fusion and entry permissiveness into cells(29–31). These findings make xCT a promising  
83 therapeutic target in cancer therapy(32–35) and in neurodegenerative or neuroinflammatory  
84 diseases(3, 5, 36, 37).

85 A detailed molecular understanding of conformational transitions of xCT during the  
86 substrate transport would offer new opportunities for drug discovery(38, 39). This warrants  
87 the need to have structural information of human cystine transporter. There have been  
88 structural experimental studies (40–42) indicating that xCT is a protein with 12  
89 transmembrane (TM) helices, both N- and C- termini located intracellularly, and re-entrant

90 loop between helices TM2 and TM3 that participate in substrate permeation. The only  
91 structures available till date are two homology models. One model was constructed using  
92 ApcT crystal structure(14). Another xCT modeled structure was reported recently (43) where  
93 human xCT structure was mapped onto the modeled structure of homologous fungal cystine  
94 transporter, CgCYN. With the advancement in membrane structural biophysics and  
95 crystallography, the transporters have been captured in different conformational states,  
96 suggesting that there are several conformational states accessible to these transporters as they  
97 switch accessibility from one side of the membrane to the other (44–52), and are now thought  
98 to operate by a common “alternating access” model(53, 54). This implies that there are still  
99 fundamental questions that are open to investigate further about xCT. What are the other  
100 conformations possible for xCT based on the structural data available? Are there intermediate  
101 conformations between these states providing insights about the conformational transitions of  
102 xCT or the substrate movement across the membrane? In this study, we have constructed  
103 homology model of xCT in two distinct conformations: inward facing occluded state and  
104 outward facing open state. More detailed investigations of structural rearrangements of  
105 transporters at atomic level have been made possible by molecular dynamics simulations  
106 (55–61). However, these conventional simulations lack to capture critical events pertaining  
107 either to conformational transitions between two conformations, or to substrate permeation  
108 pathway(60, 62) since such events require longer timescales. Fortunately, the timescale  
109 problem faced by atomic-level simulations can be alleviated by relying on biased simulations  
110 where artificial forces are generally used to accelerate transitions(63–68). One such  
111 technique, targeted molecular dynamics (TMD) simulations studies have previously been  
112 carried out to understand the conformational transitions of ATP-binding cassette transporter,  
113 BtuCD(69), human Glucose transporter GLUT1(70), Potassium channels (71), AcrB Efflux  
114 transporter (72). In this study, we have modeled xCT is two distinct conformations and  
115 employed series of TMD simulations to understand the conformational transition pathway  
116 between these two conformations. The intermediates were identified, and probable ligand  
117 binding sites were explored with both anionic L-cystine and L-glutamate substrates. The  
118 substrate bound studies provided insights about the substrate translocation/permeation  
119 pathway.

120

121

## 122 **Methods**

123 *Identification and modeling of transmembrane (TM) region of xCT*

124 Human xCT sequence was retrieved from NCBI, and an initial topology prediction was carried  
125 out using Constrained Consensus TOPology (CCTOP) server(73), which utilizes ten topology  
126 prediction methods: HMMTOP, MemBrain, Memsat, Octopus, Philius, Phobius, Pro, Prodiv,  
127 Scampi, ScampiMsa, and TMHMM in combination with the topology information from  
128 PDBTM, TOPDB, and TOPDOM databases using the probabilistic framework of hidden  
129 Markov model (Fig S11). xCT was predicted to be a 12-transmembrane helical protein with N-  
130 and C- termini located inside the cell. Sequence spanning transmembrane region (residues 45  
131 to 512) was submitted to HHPred server against PDB structures for homology detection, and  
132 two templates, ApcT (PDb id:3GIA)(74) and AdiC (PDb id:5J4I)(75) were selected using  
133 HHblits multiple sequence alignment method(76). Transmembrane region of xCT showed  
134 ~51% sequence similarity with both ApcT (E value:2.2e-32) and AdiC (E value:1.9e-32) (Fig  
135 SI2). These two structures are in different conformational states of their transport cycle. AdiC  
136 arginine antiporter is reported as substrate free outward facing state, and ApcT is reported as  
137 substrate-free inward facing occluded open state. The only inward open conformation known  
138 for any amino acid transporter is that of GadC(77). However, the reported structure consists of  
139 C-terminal fragment (C-plug) whose displacement is requisite for GadC transport activity. In  
140 absence of such information for xCT, we decided not to opt for GadC as template for this study.  
141 Comparative modeling of TMD region of xCT spanning residues 45 to 512 including TMD  
142 helices and connecting loops was carried out based on multiple sequence alignment of these  
143 two templates using Modeller9v15(78). Two representative models corresponding to the two  
144 templates were selected from the collection of 5000 models built by Modeller, based on the  
145 evaluation of discrete optimized protein energy (DOPE) potential. The models were further  
146 subjected to loop refinement module of Modeller9v15 to refine the connecting intracellular and  
147 extracellular loops, and energetically favorable models were selected among the 1000  
148 generated models based on the DOPE score. Thus, two models of xCT have been generated  
149 using two different templates in different conformational states of access cycle herein referred  
150 as Model\_Cioc (template structure: 3GIA), and Model\_Cout (template structure: 5J4I) (Fig.  
151 SI3).

152

### 153 *Minimization and refinement of modeled structure using MD in explicit membrane*

154 The selected models were minimized further to obtain stable structures using Molecular  
155 dynamics simulations. Simulation setup with model inserted into a heterogeneous fully  
156 hydrated bilayer of size 85Åx85Å, consisting of lipids as well as cholesterol molecules, was  
157 obtained using CHARMM-GUI(79) using CHARMM36m forcefields(80) for lipids as well as

158 protein. Prior to membrane insertion, we calculated rotational and translational positions of  
159 xCT models in membranes using PPM server(81), and the obtained orientation was used for  
160 positioning within lipid bilayer in CHARMM-GUI. The constituents of lipid bilayer were  
161 selected in order to mimic the human brain barrier membrane environment(82) -  
162 DPPC(5%):POPC(20%):POPE(15%):POPS(5%):POPI(5%):PSM(30%) lipids with  
163 cholesterol (20%). The structures were then solvated with TIP3P water molecules, followed by  
164 addition of K<sup>+</sup> and Cl<sup>-</sup> ions for 0.15M concentration. The assembled simulation system  
165 consisted of ~90,000 atoms. The biomolecular systems were simulated using NAMD (83).  
166 Minimization was carried out for 10000 steps, and system was equilibrated for 0.5 ns, while  
167 slowly releasing the collective variable restraints to facilitate stable simulation. Finally,  
168 structure was further simulated without any restraints for 5ns at a constant temperature of 303K  
169 using Langevin thermostat with damping coefficient of 1 ps<sup>-1</sup>, and constant pressure of 1atm  
170 using semi-isotropic Nose-Hoover Langevin piston pressure control with oscillation period of  
171 0.05ps and oscillation decay time of 0.025ps. The van der Waals interactions were smoothly  
172 switched off at 10-12Å by a force-switching function, and long-range electrostatic interactions  
173 were calculated using particle mesh Ewald method(84). All bond lengths involving hydrogen  
174 atoms were fixed using SHAKE algorithm, enabling the use of 2fs time step. The final obtained  
175 structures were then used for targeted molecular dynamics.

176

### 177 *Targeted molecular dynamics between two modelled conformations*

178 Targeted Molecular Dynamics (TMD) simulation(85) was employed to accelerate the  
179 conformational transitions by means of steering forces. The form of the force applied is  
180  $U_{TMD} = \frac{k}{2N} [RMSD(t) - RMSD^*(t)]^2$  where  $RMSD(t)$  is the root mean square deviation of N  
181 atoms with respect to target structure at time  $t$ ; and  $RMSD^*(t)$  is the prescribed root mean  
182 square deviation value at time  $t$ . Series of targeted molecular dynamics (TMD) simulations  
183 were carried out using NAMDv2.12 to view the transition dynamics of xCT transporter from  
184 one conformational state to another. Models in inward occluded state and outward open states  
185 were considered as endpoints for both cycles of TMD. One cycle of TMD comprises of two  
186 sets of independent simulations: 10 short simulations with transition occurring within 25ns,  
187 and 3 longer simulations as independent runs with transition occurring within 200ns. For  
188 shorter and longer run simulations, force constants of 5 kcal.mol<sup>-1</sup>Å<sup>-2</sup> and 2 kcal.mol<sup>-1</sup>Å<sup>-2</sup>,  
189 respectively per C $\alpha$  atom for residues 37 to 473 was used to force them into the target structure  
190 with final rmsd as 0Å. Structure obtained at the end of each TMD run was further simulated

191 for 5 ns. Similar protocol as used in above conventional MD was adopted for carrying out all  
192 the TMD simulations. In addition, harmonic restraints with force constant 10 kcal/mol were  
193 applied to restraint the orientation of overall protein molecule using *colvars* (collective  
194 variables) module. Table 2 summarizes the set of simulations carried out in this study. The  
195 total targeted molecular simulation time for xCT amounts for 1.7  $\mu$ s.

196

197 **Table 2 Targeted molecular simulations carried out in study**

| Transition Cycle | TMD                                 | Set I |      | Set II |       |
|------------------|-------------------------------------|-------|------|--------|-------|
|                  |                                     | Runs  | Time | Runs   | Time  |
| Cycle I          | Model_Cioc $\rightarrow$ Model_Cout | 10    | 25ns | 3      | 200ns |
| Cycle II         | Model_Cout $\rightarrow$ Model_Cioc | 10    | 25ns | 3      | 200ns |

198

199 *Generation of transition pathway and obtaining representative structures*

200 In order to observe the underlying dynamics of TMD, we carried out principal component  
201 analyses using Gromacs2016(86) to observe the conformation sampling of all the trajectories  
202 during the two cycles. We pooled in all the conformations for both cycles by concatenating the  
203 trajectories, and calculated the eigenvectors using *covar* module, and projected the  
204 conformations of each cycle onto these eigenvectors using *anaeig* module. All heavy atom  
205 protein coordinates from the TMD trajectories obtained during both the cycles were submitted  
206 for clustering analysis using kmeans algorithm of *cpptraj* (87) module of AMBERTools17(88).  
207 Clustering was carried out on C $\alpha$  atoms of residues 45 to 472 till 10 clusters are obtained and  
208 representative structures best fit to the cluster averaged structure were also obtained. These  
209 representative structures were used for docking purposes later.

210

211 *Docking of modeled structures with ligands*

212 Coordinates of 10 representative structures obtained after clustering were used as receptor  
213 structures for docking. For ligands, coordinates for anionic L-cystine and L-glutamate were  
214 obtained from PubChem database (<https://pubchem.ncbi.nlm.nih.gov>) in sdf format. Binding  
215 site analysis was done by docking using AutodockVina(89), a computational docking program  
216 installed as plugin in PyMol(90). Since xCT is an antiporter, simultaneous efflux of glutamate  
217 and influx of anionic cystine is also possible. Therefore, we considered docking substrates first  
218 as single ligand docking and then docked both ligands.

219 (a) *Docking with either L-cystine or L-glutamate*: Prior to docking, cavities within the  
220 representative structures were analyzed using HOLE program(91). The docking box sizes  
221 for each model were selected such that the cavity within the central channel was covered  
222 within the box volumes of  $\sim 30\text{\AA} \times 30\text{\AA} \times 30\text{\AA}$  enclosing the binding pocket. The residues  
223 within the binding pocket were defined as flexible residues to accommodate the ligands.  
224 50 docked poses were generated per docking calculation and unique docked poses based  
225 on autodock vina score and manual inspection were filtered out for further simulations. For  
226 anionic cystine, there were 45 unique binding poses observed and for glutamate there were  
227 52 binding poses observed. These single-ligand docked xCT conformations were then  
228 embedded in lipid bilayer as discussed above and simulated using similar protocol as for  
229 modeled structures for 20ns. Parameters for anionic cystine and glutamate were obtained  
230 for ligand generator module (92) of Charmm-GUI.

231 (b) *Docking of both L-cystine and L-glutamate*: The unique structures docked with single  
232 ligand (either anionic cystine or glutamate) obtained above were further used for blind  
233 docking with another ligand using Autodock Vina. For instance, 45 anionic cystine bound  
234 xCT conformations were docked again with glutamate ligand. Similarly, 52 glutamate  
235 bound xCT conformations were docked again with anionic cystine. For dual ligand  
236 docking, the box sizes were selected such that the cavities analyzed using HOLE program  
237 were covered within box volumes of  $\sim 30\text{\AA} \times 30\text{\AA} \times 30\text{\AA}$  enclosing the binding pocket. Again  
238 50 poses with both anionic cystine and glutamate docked ligands were generated for both  
239 the docking calculations. All these docked structures were then clustered using density-  
240 based clustering algorithm, *dbscan* implemented in *cpptraj* module of AmberTools17, with  
241 minimum cluster points as 20 and distance cutoff of  $0.9\text{\AA}$ . As distance metric, rmsd was  
242 calculated for C $\alpha$  atoms of residues 45 to 472 and heavy atoms belonging to anionic cystine  
243 and glutamate. There were 15 unique docked conformations observed consisting both  
244 anionic cystine and glutamate. These xCT conformations were embedded in lipid bilayer  
245 and simulated for 20ns using similar protocol as for modelled xCT conformations. The  
246 ligand docked xCT simulated systems are summarized in Table 2.

247

248 Table 2: Ligand docked xCT simulated systems

| S.No. | Ligand Docked | Docked structures | Time per run(ns) | Total simulation (ns) |
|-------|---------------|-------------------|------------------|-----------------------|
| 1     | L-cystine     | 45                | 20               | 900                   |
| 2     | L-glutamate   | 52                | 20               | 1040                  |



|   |                            |    |    |     |
|---|----------------------------|----|----|-----|
| 3 | L-cystine +<br>L-glutamate | 15 | 25 | 375 |
|---|----------------------------|----|----|-----|

249

250 *Interactions of ligands with protein*

251 All the ligand docked conformations sampled at every 2ps were pooled in to visualize protein-  
252 ligand interactions in single ligand and dual ligand docked conformations. Interaction of ligand  
253 with protein residue was defined for when heavy atom of ligand interacts with protein residue  
254 within cutoff distance of 4.0Å. Variations in interactions between ligands and protein residues  
255 were analyzed using VMD1.9.3(93).

256

257 *Generation of substrate translocation pathway.*

258 For defining the substrate translocation pathway, all simulated conformations of the ligand  
259 docked structures were pooled in for translocation analysis. In order to characterize the relation  
260 between ligand placement along the channel and xCT conformation during the transition  
261 pathway, we defined two parameters: Z-direction of distance of ligand from the center of  
262 channel; and normalized root mean square distance of xCT from the two end points. For the  
263 former parameter, center of the translocation channel was defined by the center of cavity  
264 formed by TM helices 1, 3, 6, 8, and 10. The distance of center of mass of ligand to the center  
265 of translocation channel along the z direction was analyzed to define the position of ligand  
266 along the transporter. Since all the xCT conformations were first aligned to origin, the negative  
267 z- values will mean ligands placed towards the intracellular site and positive z- values will  
268 mean ligands placed towards the extracellular site. For the dual ligand docked conformations,  
269 this parameter relates to the z-component of distance between center of masses of the two  
270 ligands. For the second parameter, we calculated root mean square deviations of the  
271 translocation channel defined by helices TM 1,3,6,8, and 10 with respect to Model\_Cioc and  
272 Model\_Cout. Then the former rmsd value was subtracted from the latter and normalized over  
273 range -1:+1 for all the ligand docked conformations. This provided qualitative picture such that  
274 conformations in the negative range will have translocation channel similar to Model\_Cioc,  
275 and conformations with normalized positive difference will have translocation channel similar  
276 to Model\_Cout. All the conformations were clustered based on these two parameters using  
277 density based (dbscan) clustering program (94)implemented in R. DBSCAN is a partitioning  
278 method, and can find out clusters of different shapes and sizes from data containing noise and  
279 outliers. The algorithm requires to specify the optimal eps value and minimum points

280 parameter, MinPts. The optimal eps parameter required for each clustering was determined by  
281 computing the k-nearest neighbor distance in a matrix of points. The respective conformations  
282 best fit to the centroids were also obtained.

283

#### 284 *Calculation of water molecules within the substrate translocation pathway*

285 We computed total number of water molecules present within the translocation pathway in  
286 presence of ligands using VMD1.9.3. The variation of number of water molecules with respect  
287 to the normalized rmsd difference as defined above was analyzed. To ensure the placement  
288 within the channel, any water molecule that is within 4.0Å of center of TM core is counted.

289

290

## 291 **Results**

### 292 *Homology modeled structures of xCT in two distinct conformations of transition cycle*

293 In the absence of a crystal structure of any cystine transporter, we built homology model of  
294 human cystine transporter *xCT* based on crystal structures of transporters that were expected  
295 to have similar folds. For building such a model, comparative analysis of *xCT* sequence using  
296 CCTOP server predicted the overall topology of the transporter to consist of 12 transmembrane  
297 domains. Based on the region spanning the transmembrane domain region (residues 45 to 512)  
298 two templates with 51% sequence similarity were identified for modeling using HHPred: ApcT  
299 (broad-specificity proton-coupled amino acid transporter from *M. jannaschii*) and AdiC (an  
300 arginine/agmatine antiporters of *E. coli*). This was followed by modeling of the transmembrane  
301 (TM) region of *xCT* using Modeller9v15.

302 Crystal structures of these two transporters have similar structural core LeuT-fold of  
303 APC transporters which consists of two intertwined 5-TM-helix repeats (TMs 1-5 and TMs 6-  
304 10) sharing a two-fold inverted pseudo symmetry(95). The two templates are in different  
305 conformational state of substrate transport cycle. ApcT structure is reported in substrate free  
306 inward facing occluded in pdbid:3GIA. AdiC is reported in substrate free outward facing state  
307 in pdbid:5J4I. The overall structure of *xCT* modeled on the above two templates reveals an  
308 overall cylindrical shape with 12 transmembrane helices with short extracellular and  
309 cytoplasmic loops and intracellular amino and carboxy termini (Fig. 1). In two models, the 12  
310 TMs are arranged in two intertwined V-shaped inverted repeating units (TMs 1-5 and TMs 6-  
311 10), followed by TMs 11 and 12. Our models are in line with the biotinylated experiments that  
312 proposed the first topological model for *xCT* of 12 transmembrane domains with the N and C  
313 termini located inside the cell(40). For the inward occluded model, we observe that the

314 intracellular loop IL23 between TM helices 2 and 3 occludes the intracellular site, and this loop  
315 is believed to be involved in substrate permeation pathway(40). The modelled structures were  
316 then embedded in heterogeneous lipid bilayer and further refined using unrestrained molecular  
317 dynamics simulations. Superposition of the simulated model structures with the templates have  
318 been shown in Fig SI3. All the models reveal a cavity lined by residues of TM1, TM3, TM6,  
319 TM8, and TM10 helices. These five transmembrane helices form the substrate translocation  
320 channel and the cavity was assessed to be large enough to accommodate the substrates, and  
321 therefore, the probable ligand binding sites (Fig. SI4). Based on the template used and cavities  
322 within channel visualizations using HOLE suite of programs, we termed as Model\_Cioc and  
323 Model\_Cout. The former is modeled using ApcT structure (PDB:3GIA), and the latter is  
324 modeled using AdiC structure (PDB:5J4I) as templates.  
325

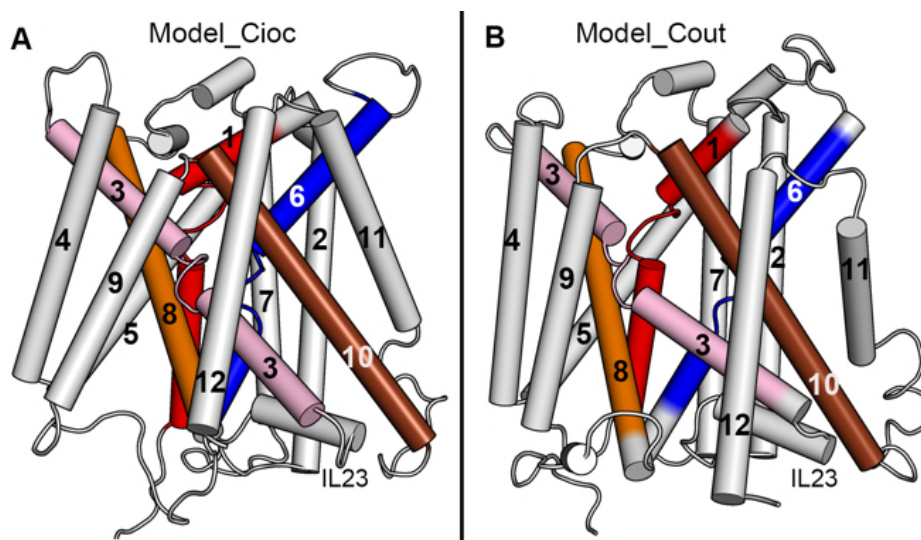

326  
327 **Fig.1: Homology structure of xCT in A. inward facing occluded state Model\_Cioc; and**  
328 **B. outward facing state: Model\_Cout. The transmembrane helices are marked and the**  
329 **five helices forming probable translocation channel are shown colored. The intracellular**  
330 **loop IL23 is also shown.**  
331

332 *Transition between two modeled xCT conformations using targeted molecular dynamics*

333 xCT is an antiporter and like any other transporters, will have to go through various  
334 conformational cycles transporting substrates in and out. We generated two models of xCT  
335 transporter in two distinct conformations of substrate transport cycle. The template crystal  
336 structures were obtained in absence of ligands, and thus, the models obtained are representative  
337 of substrate-free states.

338 We employed several targeted molecular dynamics (TMD) simulations to drive one  
339 conformation to another and the variation of root mean square deviation with respect to time

340 is shown in Fig. SI5. We investigated relative motions of transmembrane domain during TMD  
341 simulations using principal component analysis (PCA)(96). We pooled in all the conformations  
342 obtained during TMD simulations; and obtained the corresponding eigenmodes and  
343 eigenvalues. The eigenmodes associated with the largest eigenvalues have the largest  
344 contribution to the dynamics. The first three eigenmodes reflected majority of the motions  
345 during the trajectory, accounting for ~75% of the significant fluctuations. We analyzed the time  
346 behavior and distribution of the motions performed by the first top modes by projecting the  
347 conformations obtained during two cycles of transition: Cycle I and Cycle II. As can be seen  
348 from the two-dimensional scatterplots between principal components: PC1, PC2, and PC3 (Fig.  
349 2A); the conformations from two different cycles occupy mirrored conformational subspace as  
350 expected from their transitions cycle. To further visualize the significant conformational  
351 motions during transition, we generated an interpolated trajectory between the extreme  
352 conformations sampled along the first eigenvector or PC1. As can be seen from the porcupine  
353 plots along PC1 (Fig. SI6), major changes are observed for the helices TM11 and TM12 along  
354 with the intracellular and extracellular loops. The inside helical core forming the probable  
355 ligand binding channel showed lesser fluctuations (Fig. 2B), suggesting the role of outer helices  
356 in effecting the conformational transition, and probable role of inner helical core in transporter  
357 functioning.

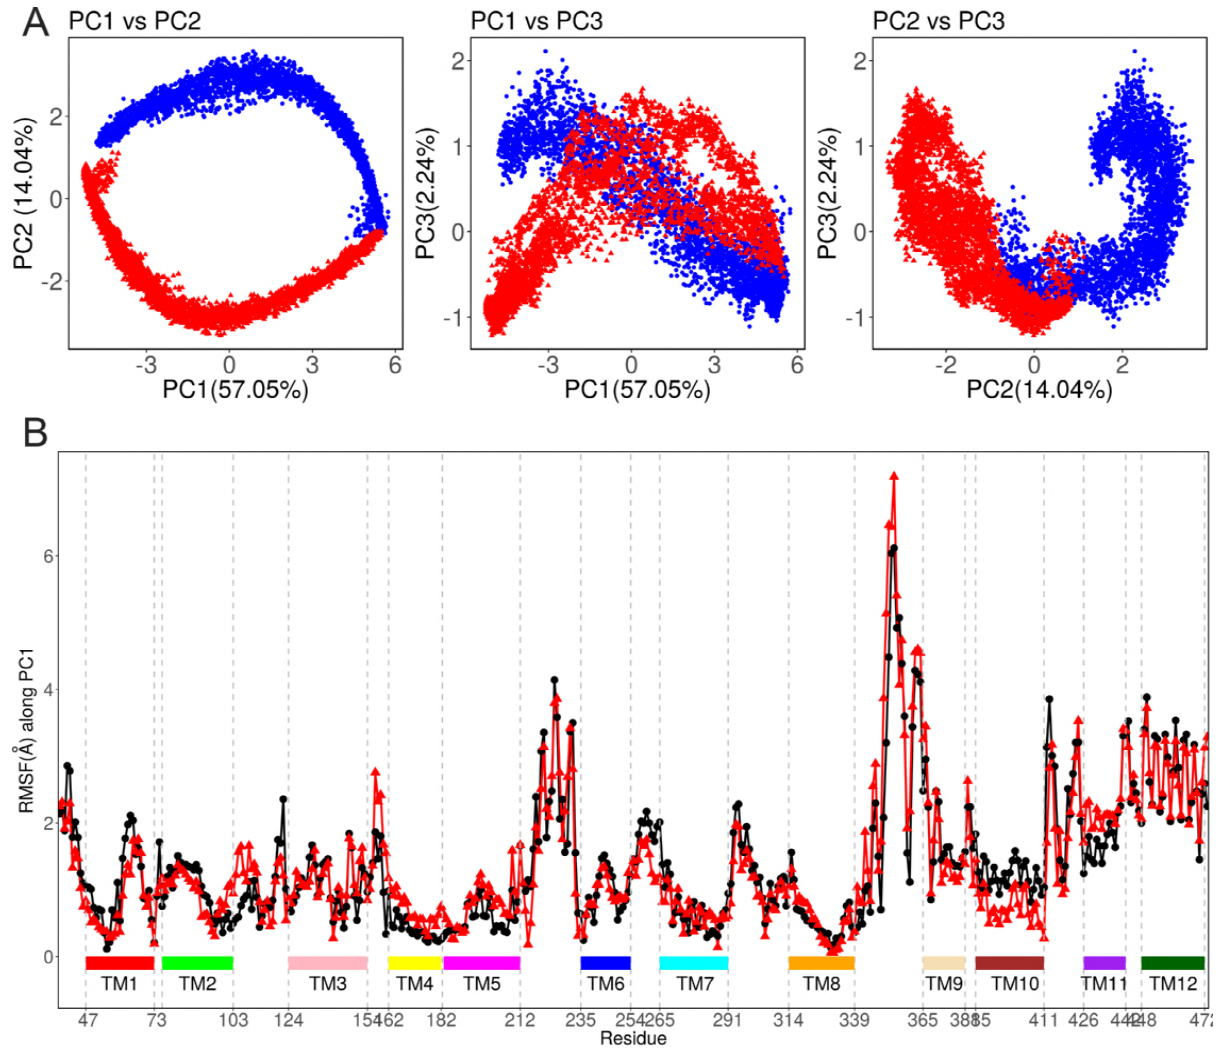

358

359 **Fig.2: Principal Component Analysis. A. 2D scatterplots of first three eigenvectors as the**  
360 **trajectories are projected onto combined trajectory of TMD simulations runs. Blue color**  
361 **dots correspond to TMD cycle I as transition from Model\_Cioc to Model\_Cout, and red**  
362 **color triangles corresponds to TMD cycle II as transition from Model\_Cout to**  
363 **Model\_Cioc. B. Root mean square fluctuations observed for C atom of each residue along**  
364 **the first eigenvector (PC1). Black dots correspond to cycle I and red triangles corresponds**  
365 **to cycle II.**

366

367

368

369 *Probable location of substrate translocation channel in xCT*

370 To elucidate further the role of probable substrate channel in substrate binding and  
371 translocation, we carried out simulations in the presence of substrates. We had two options to  
372 consider for elucidation of substrate translocation pathway: (a) one to dock the ligands to these  
373 modelled structures and then employ end point targeted molecular dynamics; and (b) second  
374 to employ the transitional conformations going from one substrate-free conformation to

375 another and then build up the substrate transition pathway by docking the representative  
376 structures obtained during the transition with ligands. Owing to the fact that the initial models  
377 are based on substrate free conformations lacking the information on substrate binding mode;  
378 and the unknown computational time required by substrate to sample the translocation channel  
379 during the transition; we opted for second method. We first sampled the transition between  
380 substrate free modeled conformations through series of short and long targeted molecular  
381 dynamics simulations; and clustered all the conformations into representative structures. We  
382 designated these structures as intermediate structures as transition cycle as xCT undergoes  
383 transition from inward occluded state to outward state. We docked these intermediate structures  
384 with ligands: anionic cystine and glutamate, to view the interactions of ligands during this  
385 transition cycle.

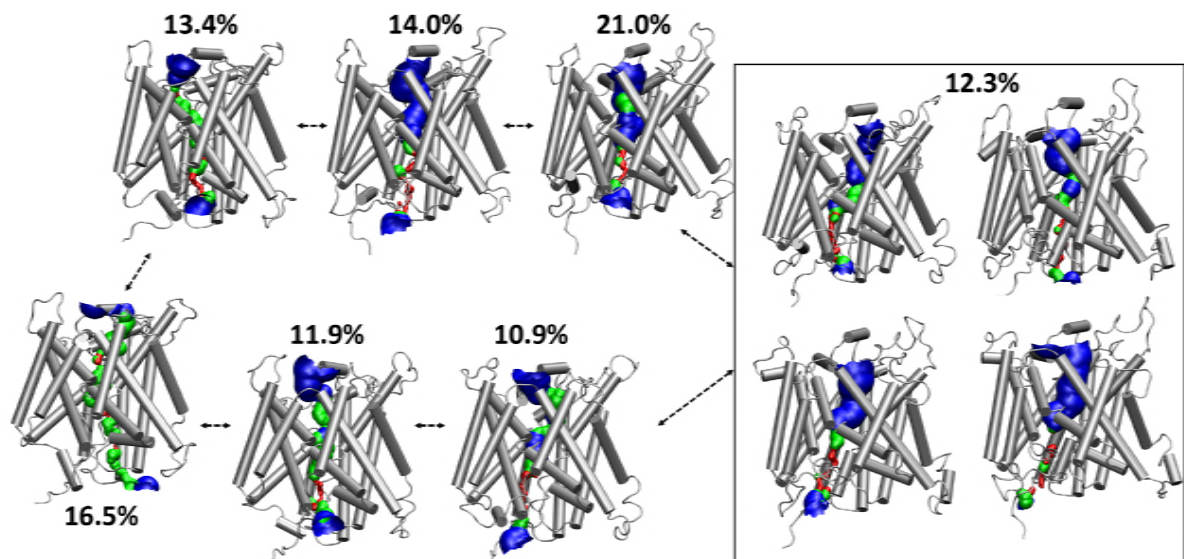

386

387 **Fig. 3. Representative structures as obtained from kmeans clustering of all the**  
388 **conformations obtained during all TMD simulations. The values in percentages show the**  
389 **fraction of conformations forming the cluster corresponding to the respective structures.**

390

391

392

393 *Docking of ligands within the translocation channel of intermediates*

394 We selected ten representative structures from the ensemble of intermediates conformations  
395 obtained for both transition cycles and docked with the substrates. Since xCT is an antiporter  
396 that exports glutamate and imports cystine, we considered following probable scenarios for  
397 substrate translocation from intracellular to extracellular side or *vice versa*:

398 a) Bimodal transport: xCT undergoes transition from inward-facing to outward facing  
399 conformation and transports intracellular glutamate out. This is followed by another transition  
400 from outward facing to inward-facing conformation as extracellular cystine is transferred  
401 inside the cell.

402 b) Unimodal transport: xCT transports both cystine and glutamate substrates in opposite  
403 directions in one cycle while undergoing transition from inward-facing to outward-facing or  
404 outward-facing to inward-facing.

405 For the first scenario, we docked the intermediates with single substrate either cystine  
406 or glutamate and visualized the ligand binding pockets and identified the interacting residues  
407 within the transporters. For the latter scenario, we docked these single-substrate bound  
408 structures with another substrate and visualized the dual ligand binding interactions.

#### 409 *Probable bimodal transport of ligands*

410 We analyzed the cavities within intermediate structures using HOLE program and docked  
411 anionic cystine or glutamate substrates to these cavities. 500 docked conformations were  
412 generated with 50 docked poses for each of 10 intermediate structures, and unique poses were  
413 filtered based on autodock vina score and manual inspection. For anionic cystine and  
414 glutamate, 45 and 52 unique docked conformations were identified, respectively. These ligand  
415 docked structures were then simulated in lipid environment; and the interactions of the ligands  
416 with the amino acids were studied. Visualizing all the docked transporter conformations, we  
417 observed that the translocation channel for xCT transporter is composed of five transmembrane  
418 helices: TM1, TM3, TM6, TM8, and TM10; and ligands were docked within this channel.  
419 Based on structural analysis of models and positioning of proteins in membrane (PPM server),  
420 the length of translocation channel is  $\sim 16.0\text{\AA}$ . We further analyzed the placement of ligands  
421 within the translocation channel by calculating the z-component of distance between center of  
422 mass of ligand and center of mass of translocation channel. Positive value of z-component  
423 indicates placement towards the extracellular site and negative value indicate placement  
424 towards the intracellular site. We observed the variations of this z-component with respect to  
425 the normalized rmsd difference of the translocation channel from the initial modelled  
426 structures. The latter will hint whether the transporter structure is close to inward-facing  
427 occluded model (Model\_Cioc) or outward-facing state (Model\_Cout). All the docked  
428 conformations were clustered based on these two parameters using density based dbscan  
429 clustering method, and obtained representative structures corresponding to unique clusters for  
430 ligand bound structures (Fig. 4). The conformations on the far left side of x-axis with negative  
431 values closer to -1 are similar to xCT structure modeled in inward-facing occluded state; and

432 the conformations on the far right side of x-axis with positive values closer to +1 are similar to  
433 xCT structure modeled in outward facing state. From docking results, we observed that there  
434 are certain conformations where ligands bind near the extracellular facing site. No  
435 conformations however, were observed where ligands bound near intracellular site. But that  
436 may be because one of the end point conformation of targeted molecular dynamics here is in  
437 inward facing occluded state, thus preventing the ligands to access further towards the  
438 intracellular site.  
439

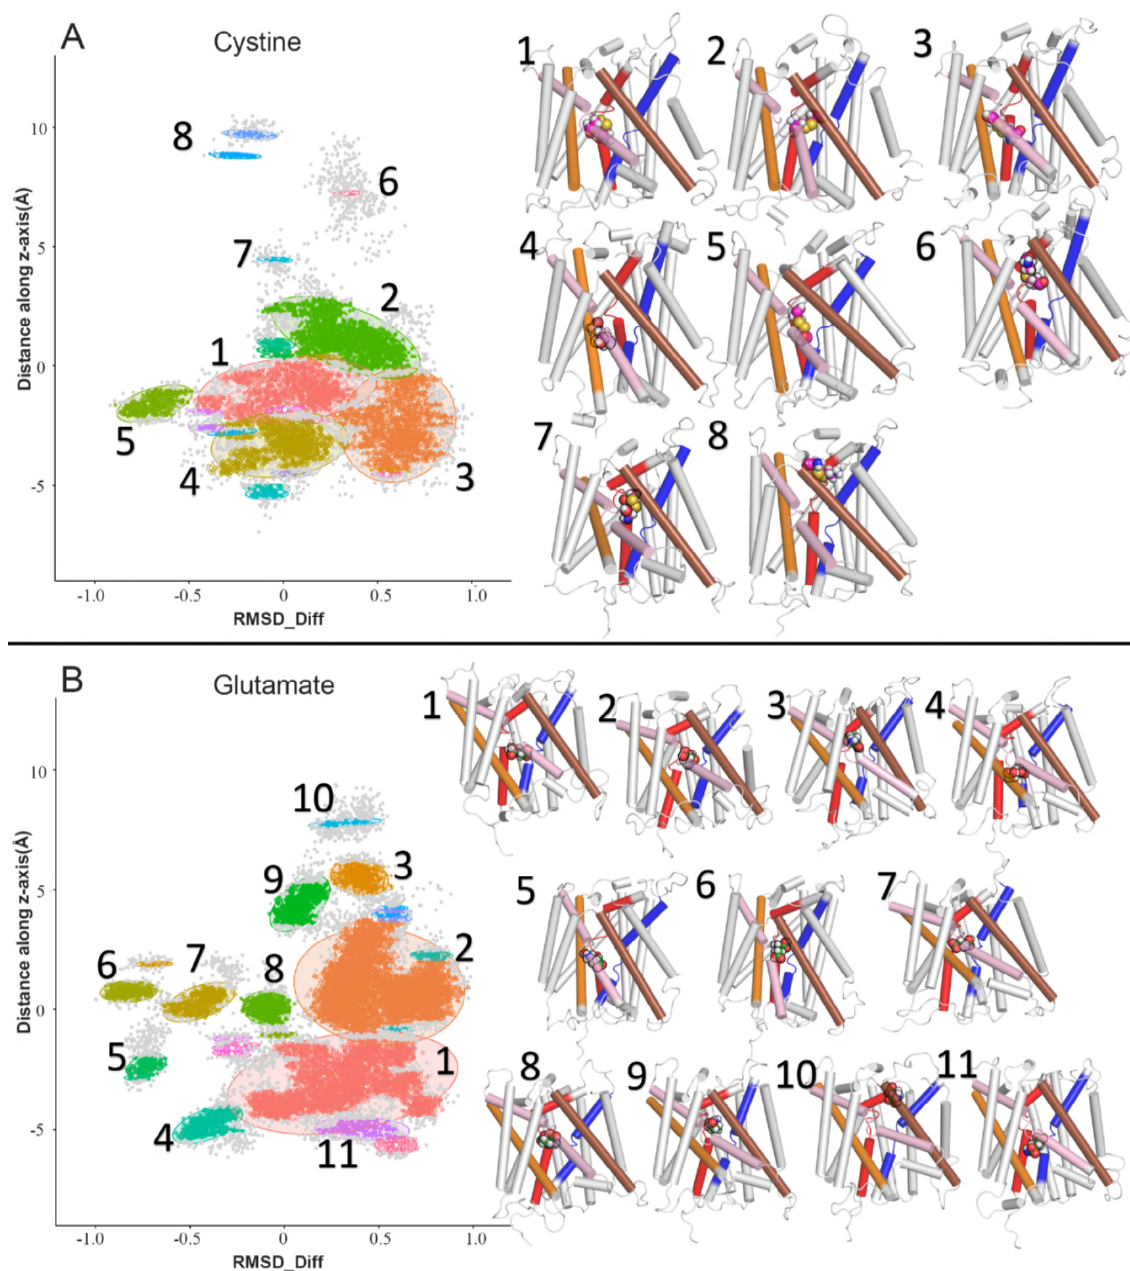

440

441 **Fig. 4. Scatter plots depicting clustering of ligand docked conformations. A. Clustering of**  
442 **conformations docked with anionic cystine, with optimal eps value of 0.075 and minimum**



443 **points of 50. B. Clustering of conformations docked with glutamate with eps value of 0.07**  
444 **and minimum points of 50. xCT structures best fit to the centroids of clusters are shown**  
445 **alongside. The helices are colored as in Fig.1, and the ligands are shown in spheres. The**  
446 **outliers are shown as grey spheres.**  
447

448 *Probable unimodal transport of ligands*

449 In a unimodal scenario, extracellular cystine intake is mediated by simultaneous exchange of  
450 intracellular glutamate. From the dual docked simulations, we observed that the cavity within  
451 the translocation channel is wide enough to bind both the ligands and transport side by side.  
452 We clustered the bound conformations based on the z-component of distance between the  
453 ligands, and normalized rmsd difference (Fig. 5). The former will indicate the relative position  
454 of ligands within the channel, with negative values indicating that glutamate is placed towards  
455 the extracellular site with respect to cystine, and positive values indicating that glutamate is  
456 placed towards the intracellular site with respect to cystine. We did comparative analysis of  
457 conformations of substrate translocation channel sampled with both cystine and glutamate  
458 ligands docked with respect to the end point modeled conformations and those observed with  
459 either cystine or glutamate docked. The right shift in the conformations along the x-axis  
460 (normalized rmsd difference) as observed in Fig 5. suggested that inward facing occluded  
461 conformations do not have enough space to bind both ligands. Rest of conformations have  
462 enough space to accommodate both ligands. In order to delineate further the bimodal transport,  
463 we looked at the interpolated trajectory between two conformations at the extreme ends of  
464 cluster analysis. The first conformation is representative of right bottom of cluster (Cluster#9),  
465 where cystine is closer to intracellular site and glutamate near to extracellular site. This  
466 conformation can be the probable conformation where cystine is transported to intracellular  
467 site as glutamate is transported out to extracellular site. The other extreme conformation is  
468 representative of upper left cluster (Cluster #8), where glutamate is closer to extracellular site  
469 and cystine near to intracellular site. This conformation can be the probable conformation  
470 where glutamate is effluxed out while cystine is influxed in. Animation movie shown in movie  
471 SM1 indicate the probable simultaneous transport of cystine and glutamate.

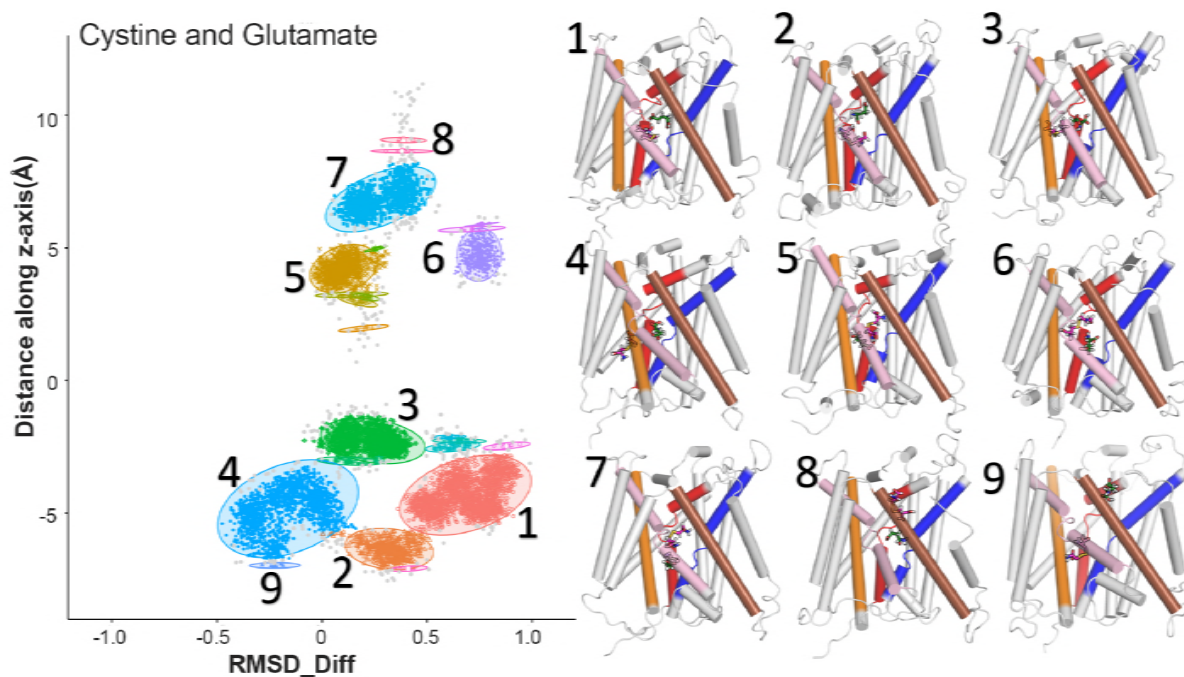

472

473

474 **Fig. 5. Scatter plots depicting clustering of xCT conformations docked with both cystine**  
475 **and glutamate; with optimal eps values of 0.65 and minimum points of 50. xCT structures**  
476 **best fit to the centroids of clusters are shown alongside. The helices are colored as in Fig.1,**  
477 **and the ligands are shown in spheres. The outliers are shown as grey spheres.**

478

479 *Probable amino acids critical for ligand binding*

480 We observed the interactions of the ligands with the amino acids of transporter protein and  
481 found that similar residues are mostly involved in interacting both anionic cystine and  
482 glutamate (Fig. 6). Most of the interacting residues belong to transmembrane helices: TM1,  
483 TM3, TM6, TM8, and TM10. For the intracellular loop (IL2), H110 was proposed to lie close  
484 to the permeation pathway, and we do observe that in docked conformations, ligands especially  
485 cystine forms weaker interaction with H110. For the extracellular loop (EL1), we observe that  
486 two residues Q71 and N72 forms transient interactions with both the ligands, and cystine forms  
487 further weak interactions with EL4 with residues L298 to N301. These may act as meeting  
488 points for ligands from the extracellular site. Experimental evidence(41) shows that C327 lies  
489 close to substrate permeation pathway, and our results do show intermittent interactions of  
490 ligands with C327. Experimental mutagenesis data for human xCT is lacking. There is  
491 experimental mutagenesis evidence of cystine binding in the homologous fungal cystine  
492 transporter, CgCYN1(43); where mutations critical for cystine binding in CgCYN1 were  
493 observed; and mapped onto the modelled structure of human xCT. The study suggests that  
494 residues F146, A247, G333, L389, and V404 are essential for substrate binding. Our interaction

495 analysis indicated that these residues or their neighboring residues form strong and pertinent  
496 interactions with both cystine and glutamate. In addition, we observed that ligands form strong  
497 interactions with “G<sup>59</sup>A<sup>60</sup>G<sup>61</sup>” motif present in TM1; and mutations in similar GXG motifs in  
498 other transporters led to severe defects(97, 98). Another conserved motif in TMD6:  
499 “(F/Y)(S/A/T)(F/Y)xGxx” have been identified critical for transporters within APC  
500 family(98). For human xCT, this motif is Y<sup>244</sup>AYAGWF<sup>250</sup> and is observed to form very strong  
501 interactions with both the ligands.

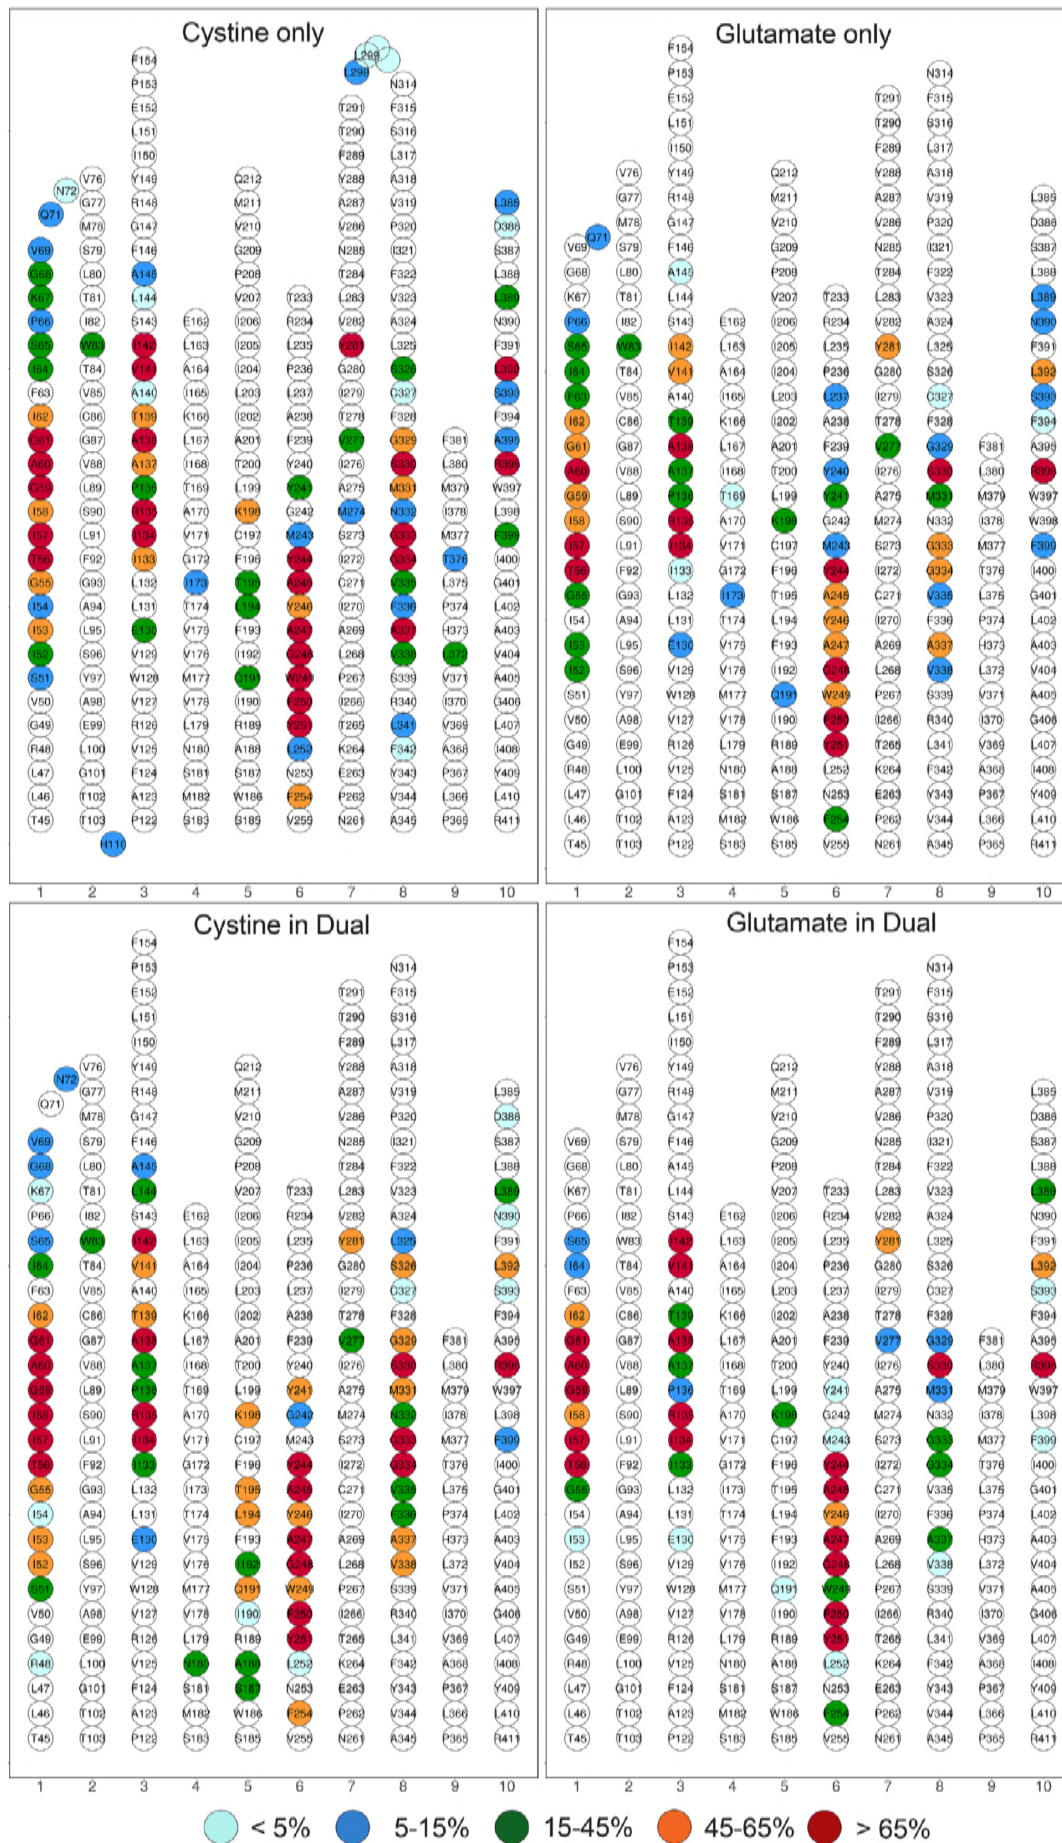

503 **Fig. 6. Interactions of ligands with the transmembrane helices. TM helices 11 and 12 are**  
504 **omitted as they do not interact with ligands. Residues that do not interact at all with the**  
505 **ligands are in white circles, and other residues are in colored circles depending on the**  
506 **frequency of their interaction with the ligand. The legend indicates the color**  
507 **corresponding to the frequency of occurrence of interaction observed for all the docked**  
508 **conformations.**

509

510

511 *Water molecules within the channel*

512 We observed that during the ligand-docked simulations, the water molecules enter the channel  
513 and occupy places along with the ligands. We thus analyzed the total number of molecules  
514 within the substrate permeation channel. To ensure the placement within the channel, any water  
515 molecule that is within 4.0Å of center of TM core is counted. Figure 7 shows the variation in  
516 total number of water molecules within the channel with respect to the normalized rmsd  
517 difference. It can be observed that more or less similar number of water molecules are present  
518 when only cystine or only glutamate are bound. Conformations towards the inward facing  
519 occluded side has a smaller number of water molecules, as less space is available within the  
520 channel. Also, when two ligands are bound, relatively less number of water molecules are  
521 observed as expected.

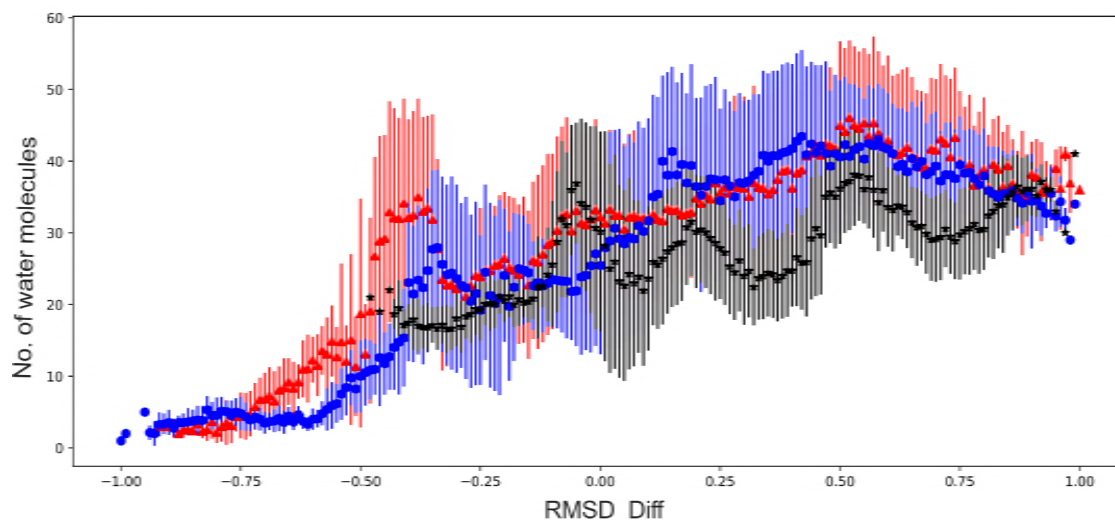

522

523

524 **Fig. 7. Number of water molecules observed within the translocation channel of ligand**  
525 **docked xCT conformations. Blue colored circles denote water molecules for glutamate-**  
526 **only docked xCT conformations, red colored triangles denote water molecules for**  
527 **cystine-only docked xCT conformations, and black stars denote water molecules for both**  
528 **glutamate and cystine docked xCT conformations.**

529

530

## 531 Discussion

532 A transporter undergoes various conformational transitions switching accessibility from  
533 extracellular site to intracellular site, and simultaneously transporting the substrates. Human  
534 xCT is an antiporter that exchanges intracellular glutamate to take up extracellular cystine.  
535 Based on its sequence similarity with other transporters, we generated two human xCT models  
536 in two different conformations: inward facing occluded state; and outward facing state. For  
537 Model\_Cioc, the inward face is observed to be occluded by intracellular loop between helices  
538 TM2 and TM3. Both models adopted similar LeuT-fold with 12 transmembrane helices  
539 arranged in two intertwined V-shaped inverted repeating units (TMs 1-5 and TMs 6-10),  
540 followed by TMs 11 and 12. Comparative analysis of these models suggested presence of  
541 substrate translocation channel of cylindrical shape formed by five helices TM1, TM3, TM6,  
542 TM8, and TM10.

543 We further carried out conformational transitions using targeted molecular dynamics  
544 simulations from one model to another as end points, and *vice versa*. Series of TMD  
545 simulations were run for shorter and longer timescales; and suggested that the majority of the  
546 conformational change is effected by the residues in loops and helices TM11 and TM12. Rest  
547 of the helices show considerably less effect, indicating the binding cavity for the channel is  
548 maintained during the conformational transition. We then identified the intermediates during  
549 the transition simulations based on clustering analysis; and docked them with the ligands to  
550 understand the ligand binding. For xCT being an antiporter, two scenarios seemed feasible. In  
551 first scenario, intracellular glutamate is effluxed out, and then extracellular cystine is taken in;  
552 or *vice versa*. In second scenario, as intracellular glutamate in effluxed out, extracellular cystine  
553 is simultaneously taken in. So, we did two docking studies: first with single ligands, and second  
554 with both the ligands.

555 All the docked conformations were simulated to allow ligands to explore  
556 conformational space within the channel. These conformations were then clustered to identify  
557 the conformations that uniquely represent the placement of ligand within the channel as the  
558 xCT adopts certain conformation. There were conformations observed where the ligands are  
559 placed near the extracellular site. In case of single ligand binding (bimodal transport), these  
560 conformations can be marked as; when the extracellular cystine is taken in (as represented by  
561 Cluster#6 in Fig. 4A) and when the intracellular glutamate is transported out (as represented  
562 by Cluster#8 in Fig. 4B). Since xCT is modeled in intracellular occluded state, we observe that  
563 cystine and glutamate interacts with IL23 on their way from extracellular and intracellular sites  
564 as represented by Cluster#5 in Figs. 4A and 4B, respectively. In case of dual ligand binding

565 (unimodal transport), it seems that the inward occluded model of xCT does not have enough  
566 space to bind both ligands and suggested slight opening up of channel when both ligands are  
567 present. We however, do see feasible transition as glutamate and cystine are transported out  
568 and in, simultaneously. However, we cannot rule out the fact that transition from inward facing  
569 occluded state to inward facing open conformation may facilitate further the simultaneous  
570 transport of anionic cystine and glutamate across the membrane. This will require more  
571 investigation of transition dynamics going from occluded to open state and is a subject of  
572 further studies beyond this work.

573 We also investigated the interactions of ligand with the xCT. Both ligands seem to bind  
574 similar residues, specifically those belonging to helices TM1, TM3, TM6, TM8, and TM10.  
575 These interactions were then categorized based on their occurrence during all the ligand bound  
576 simulations, and the critical residues for ligand binding were observed. Though, human xCT  
577 mutagenesis data is lacking, but mutagenesis study of homologous fungal transporter,  
578 CgCYN(43) suggested that mutating similar residues in CgCYN resulted in severe defects in  
579 transporter functioning. The proximity of C327 belonging to TM8 to the substrate permeation  
580 pathway was observed experimentally(41), and we do observe its intermittent interactions with  
581 the ligands in our docked conformations. We also observed the presence of water molecules  
582 within the channel along with the ligands.

583 Combining the transition dynamics and docking studies, we have investigated the  
584 ligand translocation mechanism for human cystine transporter, xCT as it undergoes  
585 conformational transition from extracellular open to intracellular occluded state. Our studies  
586 indicate that there is feasibility of both the scenarios when the ligands can be transported in  
587 unimodal mode as well as bimodal mode. To explore the complete scenario, more experimental  
588 structures or data are required to investigate further about the intracellular open state of xCT.

589

## 590 **Conclusion**

591 We have investigated the transition of xCT between two conformations: inward occluded state  
592 and outward open state. The conformational changes during the dynamics were studied, and  
593 intermediate structures were identified. The latter were used for docking studies where anionic  
594 cystine and glutamate were docked either alone or in combination. We observed that the  
595 ligands bind within the translocation channel formed by helices TM1, 3, 6, 8 and 10; and similar  
596 residues interact with the ligands. These residues map well to the experimentally known  
597 important residues important for ligand binding in human xCT or homologous fungal cystine  
598 transporter, CgCYN.

599

## 600 **Acknowledgements**

601 MS thanks Department of Science and Technology (DST), India for INSPIRE Award and  
602 research grant (IFA14-CH-165).

## 603 **Supplementary Information**

604 Supplementary document consists of figures SI1-SI6.

## 605 **Contributions**

606 M.S. conceived, designed, and performed the experiments. A.C.R performed initial  
607 experiments. M.S. analyzed the data and wrote the paper. M.S. and A.C.R contributed the  
608 literature materials and reviewed the manuscript.

## 609 **Competing interests**

610 The authors declare no competing financial interests.

611

612

613

## 614 **References**

- 615 1. Bannai, S., and E. Kitamura. 1980. Transport interaction of L-cystine and L-glutamate  
616 in human diploid fibroblasts in culture. *J. Biol. Chem.* 255: 2372–2376.
- 617 2. Makowske, M., and H.N. Christensen. 1982. Contrasts in transport systems for anionic  
618 amino acids in hepatocytes and a hepatoma cell line HTC. *J. Biol. Chem.* 257: 5663–  
619 5670.
- 620 3. Albrecht, P., J. Lewerenz, S. Dittmer, R. Noack, P. Maher, and A. Methner. 2010.  
621 Mechanisms of oxidative glutamate toxicity: the glutamate/cystine antiporter system xc-  
622 as a neuroprotective drug target. *CNS Neurol Disord Drug Targets.* 9: 373–382.
- 623 4. Domercq, M., M.V. Sánchez-Gómez, C. Sherwin, E. Etxebarria, R. Fern, and C. Matute.  
624 2007. System xc- and glutamate transporter inhibition mediates microglial toxicity to  
625 oligodendrocytes. *J. Immunol.* 178: 6549–6556.
- 626 5. Lewerenz, J., S.J. Hewett, Y. Huang, M. Lambros, P.W. Gout, P.W. Kalivas, A. Massie,  
627 I. Smolders, A. Methner, M. Pergande, S.B. Smith, V. Ganapathy, and P. Maher. 2013.  
628 The Cystine/Glutamate Antiporter System xc- in Health and Disease: From Molecular  
629 Mechanisms to Novel Therapeutic Opportunities. *Antioxid Redox Signal.* 18: 522–555.
- 630 6. Bassi, M.T., E. Gasol, M. Manzoni, M. Pineda, M. Riboni, R. Martín, A. Zorzano, G.  
631 Borsani, and M. Palacín. 2001. Identification and characterisation of human xCT that  
632 co-expresses, with 4F2 heavy chain, the amino acid transport activity system xc-.  
633 *Pflugers Arch.* 442: 286–296.



- 634 7. Sato, H., M. Tamba, K. Kuriyama-Matsumura, S. Okuno, and S. Bannai. 2000.  
635 Molecular cloning and expression of human xCT, the light chain of amino acid transport  
636 system xc<sup>-</sup>. *Antioxid. Redox Signal.* 2: 665–671.
- 637 8. Reig, N., J. Chillarón, P. Bartoccioni, E. Fernández, A. Bendahan, A. Zorzano, B.  
638 Kanner, M. Palacín, and J. Bertran. 2002. The light subunit of system b<sub>(o,+)</sub> is fully  
639 functional in the absence of the heavy subunit. *EMBO J.* 21: 4906–4914.
- 640 9. Sato, H., A. Shiiya, M. Kimata, K. Maebara, M. Tamba, Y. Sakakura, N. Makino, F.  
641 Sugiyama, K. Yagami, T. Moriguchi, S. Takahashi, and S. Bannai. 2005. Redox  
642 Imbalance in Cystine/Glutamate Transporter-deficient Mice. *J. Biol. Chem.* 280:  
643 37423–37429.
- 644 10. Bannai, S. 1986. Exchange of cystine and glutamate across plasma membrane of human  
645 fibroblasts. *J. Biol. Chem.* 261: 2256–2263.
- 646 11. Cho, Y., and S. Bannai. 1990. Uptake of glutamate and cysteine in C-6 glioma cells and  
647 in cultured astrocytes. *J. Neurochem.* 55: 2091–2097.
- 648 12. Kato, S., S. Ishita, K. Sugawara, and K. Mawatari. 1993. Cystine/glutamate antiporter  
649 expression in retinal müller glial cells: Implications for dl-alpha-aminoadipate toxicity.  
650 *Neuroscience.* 57: 473–482.
- 651 13. Kato, S., K. Negishi, K. Mawatari, and C.-H. Kuo. 1992. A mechanism for glutamate  
652 toxicity in the C6 glioma cells involving inhibition of cystine uptake leading to  
653 glutathione depletion. *Neuroscience.* 48: 903–914.
- 654 14. Bridges, C.C., R. Kekuda, H. Wang, P.D. Prasad, P. Mehta, W. Huang, S.B. Smith, and  
655 V. Ganapathy. 2001. Structure, Function, and Regulation of Human Cystine/Glutamate  
656 Transporter in Retinal Pigment Epithelial Cells. *Invest. Ophthalmol. Vis. Sci.* 42: 47–  
657 54.
- 658 15. Lin, C.-H., P.-P. Lin, C.-Y. Lin, C.-H. Lin, C.-H. Huang, Y.-J. Huang, and H.-Y. Lane.  
659 2016. Decreased mRNA expression for the two subunits of system xc<sup>(-)</sup>, SLC3A2 and  
660 SLC7A11, in WBC in patients with schizophrenia: Evidence in support of the hypo-  
661 glutamatergic hypothesis of schizophrenia. *J Psychiatr Res.* 72: 58–63.
- 662 16. Fournier, M., A. Monin, C. Ferrari, P.S. Baumann, P. Conus, and K. Do. 2017.  
663 Implication of the glutamate–cystine antiporter xCT in schizophrenia cases linked to  
664 impaired GSH synthesis. *npj Schizophrenia.* 3: 31.
- 665 17. Mesci, P., S. Zaïdi, C.S. Lobsiger, S. Millecamps, C. Escartin, D. Seilhean, H. Sato, M.  
666 Mallat, and S. Boillée. 2015. System xc<sup>-</sup> is a mediator of microglial function and its  
667 deletion slows symptoms in amyotrophic lateral sclerosis mice. *Brain.* 138: 53–68.
- 668 18. Pampliega, O., M. Domercq, F.N. Soria, P. Villoslada, A. Rodríguez-Antigüedad, and  
669 C. Matute. 2011. Increased expression of cystine/glutamate antiporter in multiple  
670 sclerosis. *J Neuroinflammation.* 8: 63.
- 671 19. Massie, A., A. Schallier, B. Mertens, K. Vermoesen, S. Bannai, H. Sato, I. Smolders,  
672 and Y. Michotte. 2008. Time-dependent changes in striatal xCT protein expression in  
673 hemi-Parkinson rats. *Neuroreport.* 19: 1589–1592.

- 674 20. Lo, M., V. Ling, Y.Z. Wang, and P.W. Gout. 2008. The  $x_c^-$  cystine/glutamate antiporter:  
675 a mediator of pancreatic cancer growth with a role in drug resistance. *British Journal of*  
676 *Cancer*. 99: 464–472.
- 677 21. Habib, E., K. Linher-Melville, H.-X. Lin, and G. Singh. 2015. Expression of xCT and  
678 activity of system xc(-) are regulated by NRF2 in human breast cancer cells in response  
679 to oxidative stress. *Redox Biol*. 5: 33–42.
- 680 22. Ruiu, R., V. Rolih, E. Bolli, G. Barutello, F. Riccardo, E. Quaglino, I.F. Merighi, F.  
681 Pericle, G. Donofrio, F. Cavallo, and L. Conti. 2018. Fighting breast cancer stem cells  
682 through the immune-targeting of the xCT cystine-glutamate antiporter. *Cancer*  
683 *Immunol. Immunother.* .
- 684 23. Ye, P., J. Mimura, T. Okada, H. Sato, T. Liu, A. Maruyama, C. Ohyama, and K. Itoh.  
685 2014. Nrf2- and ATF4-dependent upregulation of xCT modulates the sensitivity of T24  
686 bladder carcinoma cells to proteasome inhibition. *Mol. Cell. Biol*. 34: 3421–3434.
- 687 24. Ji, X., J. Qian, S.M.J. Rahman, P.J. Siska, Y. Zou, B.K. Harris, M.D. Hoeksema, I.A.  
688 Trenary, C. Heidi, R. Eisenberg, J.C. Rathmell, J.D. Young, and P.P. Massion. 2018.  
689 xCT (SLC7A11)-mediated metabolic reprogramming promotes non-small cell lung  
690 cancer progression. *Oncogene* .
- 691 25. Sugano, K., K. Maeda, H. Ohtani, H. Nagahara, M. Shibutani, and K. Hirakawa. 2015.  
692 Expression of xCT as a predictor of disease recurrence in patients with colorectal  
693 cancer. *Anticancer Res*. 35: 677–682.
- 694 26. Dai, L., M.C. Noverr, C. Parsons, J.A.R. Kaleeba, and Z. Qin. 2015. xCT, not just an  
695 amino-acid transporter: a multi-functional regulator of microbial infection and  
696 associated diseases. *Front Microbiol*. 6.
- 697 27. Okuno, S., H. Sato, K. Kuriyama-Matsumura, M. Tamba, H. Wang, S. Sohda, H.  
698 Hamada, H. Yoshikawa, T. Kondo, and S. Bannai. 2003. Role of cystine transport in  
699 intracellular glutathione level and cisplatin resistance in human ovarian cancer cell  
700 lines. *Br. J. Cancer*. 88: 951–956.
- 701 28. Yang, P., J.O. Ebbert, Z. Sun, and R.M. Weinshilboum. 2006. Role of the glutathione  
702 metabolic pathway in lung cancer treatment and prognosis: a review. *J. Clin. Oncol*. 24:  
703 1761–1769.
- 704 29. Kaleeba, J.A.R., and E.A. Berger. 2006. Kaposi's sarcoma-associated herpesvirus  
705 fusion-entry receptor: cystine transporter xCT. *Science*. 311: 1921–1924.
- 706 30. Qin, Z., E. Freitas, R. Sullivan, S. Mohan, R. Bacelieri, D. Branch, M. Romano, P.  
707 Kearney, J. Oates, K. Plaisance, R. Renne, J. Kaleeba, and C. Parsons. 2010.  
708 Upregulation of xCT by KSHV-Encoded microRNAs Facilitates KSHV Dissemination  
709 and Persistence in an Environment of Oxidative Stress. *PLOS Pathogens*. 6: e1000742.
- 710 31. Chandran, B. 2010. Early Events in Kaposi's Sarcoma-Associated Herpesvirus Infection  
711 of Target Cells. *J. Virol*. 84: 2188–2199.

- 712 32. Dai, Z., Y. Huang, W. Sadee, and P. Blower. 2007. Chemoinformatics analysis  
713 identifies cytotoxic compounds susceptible to chemoresistance mediated by glutathione  
714 and cystine/glutamate transport system xc-. *J. Med. Chem.* 50: 1896–1906.
- 715 33. Dai, L., M.C. Noverr, C. Parsons, J.A.R. Kaleeba, and Z. Qin. 2015. xCT, not just an  
716 amino-acid transporter: a multi-functional regulator of microbial infection and  
717 associated diseases. *Front Microbiol.* 6.
- 718 34. Shin, C.-S., P. Mishra, J.D. Watrous, V. Carelli, M. D'Aurelio, M. Jain, and D.C. Chan.  
719 2017. The glutamate/cystine xCT antiporter antagonizes glutamine metabolism and  
720 reduces nutrient flexibility. *Nature Communications.* 8: 15074.
- 721 35. Koppula, P., Y. Zhang, L. Zhuang, and B. Gan. 2018. Amino acid transporter  
722 SLC7A11/xCT at the crossroads of regulating redox homeostasis and nutrient  
723 dependency of cancer. *Cancer Commun (Lond).* 38: 12.
- 724 36. Lewerenz, J., P. Albrecht, M.-L.T. Tien, N. Henke, S. Karumbayaram, H.I. Kornblum,  
725 M. Wiedau-Pazos, D. Schubert, P. Maher, and A. Methner. 2009. Induction of Nrf2 and  
726 xCT are involved in the action of the neuroprotective antibiotic ceftriaxone in vitro. *J.*  
727 *Neurochem.* 111: 332–343.
- 728 37. Savaskan, N.E., Z. Fan, T. Broggin, M. Buchfelder, and I.Y. Eyüpoglu. 2015.  
729 Neurodegeneration in the Brain Tumor Microenvironment: Glutamate in the Limelight.  
730 *Curr Neuropharmacol.* 13: 258–265.
- 731 38. Gout, P.W., A.R. Buckley, C.R. Simms, and N. Bruchovsky. 2001. Sulfasalazine, a  
732 potent suppressor of lymphoma growth by inhibition of the x(c)- cystine transporter: a  
733 new action for an old drug. *Leukemia.* 15: 1633–1640.
- 734 39. Sehm, T., Z. Fan, A. Ghoochani, M. Rauh, T. Engelhorn, G. Minakaki, A. Dörfler, J.  
735 Klucken, M. Buchfelder, I.Y. Eyüpoglu, and N. Savaskan. 2016. Sulfasalazine impacts  
736 on ferroptotic cell death and alleviates the tumor microenvironment and glioma-induced  
737 brain edema. *Oncotarget.* 7: 36021–36033.
- 738 40. Gasol, E., M. Jiménez-Vidal, J. Chillarón, A. Zorzano, and M. Palacín. 2004. Membrane  
739 Topology of System Xc- Light Subunit Reveals a Re-entrant Loop with Substrate-  
740 restricted Accessibility. *J. Biol. Chem.* 279: 31228–31236.
- 741 41. Jiménez-Vidal, M., E. Gasol, A. Zorzano, V. Nunes, M. Palacín, and J. Chillarón. 2004.  
742 Thiol Modification of Cysteine 327 in the Eighth Transmembrane Domain of the Light  
743 Subunit xCT of the Heteromeric Cystine/Glutamate Antiporter Suggests Close  
744 Proximity to the Substrate Binding Site/Permeation Pathway. *J. Biol. Chem.* 279:  
745 11214–11221.
- 746 42. Kim, J.Y., Y. Kanai, A. Chairoungdua, S.H. Cha, H. Matsuo, D.K. Kim, J. Inatomi, H.  
747 Sawa, Y. Ida, and H. Endou. 2001. Human cystine/glutamate transporter: cDNA cloning  
748 and upregulation by oxidative stress in glioma cells. *Biochimica et Biophysica Acta*  
749 *(BBA) - Biomembranes.* 1512: 335–344.

- 750 43. Deshpande, A.A., M. Sharma, and A.K. Bachhawat. 2017. Insights into the molecular  
751 basis for substrate binding and specificity of the fungal cystine transporter CgCYN1.  
752 *Biochim Biophys Acta.* 1859: 2259–2268.
- 753 44. Drew, D., and O. Boudker. 2016. Shared Molecular Mechanisms of Membrane  
754 Transporters. *Annu. Rev. Biochem.* 85: 543–572.
- 755 45. Forrest, L.R., Y.-W. Zhang, M.T. Jacobs, J. Gesmonde, L. Xie, B.H. Honig, and G.  
756 Rudnick. 2008. Mechanism for alternating access in neurotransmitter transporters. *Proc*  
757 *Natl Acad Sci U S A.* 105: 10338–10343.
- 758 46. Latorraca, N.R., N.M. Fastman, A.J. Venkatakrishnan, W.B. Frommer, R.O. Dror, and  
759 L. Feng. 2017. Mechanism of Substrate Translocation in an Alternating Access  
760 Transporter. *Cell.* 169: 96-107.e12.
- 761 47. LeVine, M.V., M.A. Cuendet, G. Khelashvili, and H. Weinstein. 2016. Allosteric  
762 Mechanisms of Molecular Machines at the Membrane: Transport by Sodium-Coupled  
763 Symporters. *Chem. Rev.* 116: 6552–6587.
- 764 48. Locher, K.P. 2016. Mechanistic diversity in ATP-binding cassette (ABC) transporters.  
765 *Nat. Struct. Mol. Biol.* 23: 487–493.
- 766 49. Palmgren, M.G., and P. Nissen. 2011. P-type ATPases. *Annu Rev Biophys.* 40: 243–  
767 266.
- 768 50. Quistgaard, E.M., C. Löw, F. Guettou, and P. Nordlund. 2016. Understanding transport  
769 by the major facilitator superfamily (MFS): structures pave the way. *Nat. Rev. Mol. Cell*  
770 *Biol.* 17: 123–132.
- 771 51. Weyand, S., T. Shimamura, O. Beckstein, M.S.P. Sansom, S. Iwata, P.J.F. Henderson,  
772 and A.D. Cameron. 2011. The alternating access mechanism of transport as observed in  
773 the sodium-hydantoin transporter Mhp1. *J Synchrotron Radiat.* 18: 20–23.
- 774 52. Yan, N. 2015. Structural Biology of the Major Facilitator Superfamily Transporters.  
775 *Annu Rev Biophys.* 44: 257–283.
- 776 53. Jardetzky, O. 1966. Simple allosteric model for membrane pumps. *Nature.* 211: 969–  
777 970.
- 778 54. Mitchell, P. 1957. A general theory of membrane transport from studies of bacteria.  
779 *Nature.* 180: 134–136.
- 780 55. Adelman, J.L., C. Ghezzi, P. Bisignano, D.D.F. Loo, S. Choe, J. Abramson, J.M.  
781 Rosenberg, E.M. Wright, and M. Grabe. 2016. Stochastic steps in secondary active  
782 sugar transport. *Proc. Natl. Acad. Sci. U.S.A.* 113: E3960-3966.
- 783 56. Dror, R.O., R.M. Dirks, J.P. Grossman, H. Xu, and D.E. Shaw. 2012. Biomolecular  
784 simulation: a computational microscope for molecular biology. *Annu Rev Biophys.* 41:  
785 429–452.
- 786 57. Faraldo-Gómez, J.D., and L.R. Forrest. 2011. Modeling and simulation of ion-coupled  
787 and ATP-driven membrane proteins. *Curr. Opin. Struct. Biol.* 21: 173–179.

- 788 58. Fukuda, M., H. Takeda, H.E. Kato, S. Doki, K. Ito, A.D. Maturana, R. Ishitani, and O.  
789 Nureki. 2015. Structural basis for dynamic mechanism of nitrate/nitrite antiport by  
790 NarK. *Nat Commun.* 6: 7097.
- 791 59. Lee, S., J.M.J. Swanson, and G.A. Voth. 2016. Multiscale Simulations Reveal Key  
792 Aspects of the Proton Transport Mechanism in the ClC-ec1 Antiporter. *Biophys. J.* 110:  
793 1334–1345.
- 794 60. Li, J., P.-C. Wen, M. Moradi, and E. Tajkhorshid. 2015. Computational characterization  
795 of structural dynamics underlying function in active membrane transporters. *Curr. Opin.*  
796 *Struct. Biol.* 31: 96–105.
- 797 61. Watanabe, A., S. Choe, V. Chaptal, J.M. Rosenberg, E.M. Wright, M. Grabe, and J.  
798 Abramson. 2010. The mechanism of sodium and substrate release from the binding  
799 pocket of vSGLT. *Nature.* 468: 988–991.
- 800 62. Shaikh, S.A., J. Li, G. Enkavi, P.-C. Wen, Z. Huang, and E. Tajkhorshid. 2013.  
801 Visualizing functional motions of membrane transporters with molecular dynamics  
802 simulations. *Biochemistry.* 52: 569–587.
- 803 63. Cheng, M.H., and I. Bahar. 2014. Complete mapping of substrate translocation  
804 highlights the role of LeuT N-terminal segment in regulating transport cycle. *PLoS*  
805 *Comput. Biol.* 10: e1003879.
- 806 64. Gu, Y., I.H. Shrivastava, S.G. Amara, and I. Bahar. 2009. Molecular simulations  
807 elucidate the substrate translocation pathway in a glutamate transporter. *Proc. Natl.*  
808 *Acad. Sci. U.S.A.* 106: 2589–2594.
- 809 65. Liu, Y., M. Ke, and H. Gong. 2015. Protonation of Glu(135) Facilitates the Outward-to-  
810 Inward Structural Transition of Fucose Transporter. *Biophys. J.* 109: 542–551.
- 811 66. Moradi, M., G. Enkavi, and E. Tajkhorshid. 2015. Atomic-level characterization of  
812 transport cycle thermodynamics in the glycerol-3-phosphate:phosphate antiporter. *Nat*  
813 *Commun.* 6: 8393.
- 814 67. Moradi, M., and E. Tajkhorshid. 2013. Mechanistic picture for conformational transition  
815 of a membrane transporter at atomic resolution. *Proc. Natl. Acad. Sci. U.S.A.* 110:  
816 18916–18921.
- 817 68. Shimamura, T., S. Weyand, O. Beckstein, N.G. Rutherford, J.M. Hadden, D. Sharples,  
818 M.S.P. Sansom, S. Iwata, P.J.F. Henderson, and A.D. Cameron. 2010. Molecular basis  
819 of alternating access membrane transport by the sodium-hydantoin transporter Mhp1.  
820 *Science.* 328: 470–473.
- 821 69. Weng, J., K. Fan, and W. Wang. 2012. The Conformational Transition Pathways of  
822 ATP-Binding Cassette Transporter BtuCD Revealed by Targeted Molecular Dynamics  
823 Simulation. *PLOS ONE.* 7: e30465.
- 824 70. Park, M.-S. 2015. Molecular Dynamics Simulations of the Human Glucose Transporter  
825 GLUT1. *PLOS ONE.* 10: e0125361.

- 826 71. Mashl, R.J., and E. Jakobsson. 2008. End-Point Targeted Molecular Dynamics: Large-  
827 Scale Conformational Changes in Potassium Channels. *Biophysical Journal*. 94: 4307–  
828 4319.
- 829 72. Schulz, R., A.V. Vargiu, P. Ruggerone, and U. Kleinekathöfer. 2015. Computational  
830 Study of Correlated Domain Motions in the AcrB Efflux Transporter. *BioMed Research*  
831 *International*. .
- 832 73. Dobson, L., I. Reményi, and G.E. Tusnányi. 2015. CCTOP: a Consensus Constrained  
833 TOPology prediction web server. *Nucleic Acids Res.* 43: W408-412.
- 834 74. Shaffer, P.L., A. Goehring, A. Shankaranarayanan, and E. Gouaux. 2009. Structure and  
835 mechanism of a Na<sup>+</sup>-independent amino acid transporter. *Science*. 325: 1010–1014.
- 836 75. Ilgü, H., J.-M. Jeckelmann, V. Gapsys, Z. Ucurum, B.L. de Groot, and D. Fotiadis.  
837 2016. Insights into the molecular basis for substrate binding and specificity of the wild-  
838 type L-arginine/agmatine antiporter AdiC. *Proc. Natl. Acad. Sci. U.S.A.* 113: 10358–  
839 10363.
- 840 76. Zimmermann, L., A. Stephens, S.-Z. Nam, D. Rau, J. Kübler, M. Lozajic, F. Gabler, J.  
841 Söding, A.N. Lupas, and V. Alva. 2018. A Completely Reimplemented MPI  
842 Bioinformatics Toolkit with a New HHpred Server at its Core. *J. Mol. Biol.* 430: 2237–  
843 2243.
- 844 77. Ma, D., P. Lu, C. Yan, C. Fan, P. Yin, J. Wang, and Y. Shi. 2012. Structure and  
845 mechanism of a glutamate-GABA antiporter. *Nature*. 483: 632–636.
- 846 78. Eswar, N., B. Webb, M.A. Marti-Renom, M.S. Madhusudhan, D. Eramian, M. Shen, U.  
847 Pieper, and A. Sali. 2006. Comparative Protein Structure Modeling Using Modeller.  
848 *Curr Protoc Bioinformatics*. 0 5: Unit-5.6.
- 849 79. Jo, S., X. Cheng, J. Lee, S. Kim, S.-J. Park, D.S. Patel, A.H. Beaven, K.I. Lee, H. Rui,  
850 S. Park, H.S. Lee, B. Roux, A.D. MacKerell, J.B. Klauda, Y. Qi, and W. Im. 2017.  
851 CHARMM-GUI 10 years for biomolecular modeling and simulation. *J Comput Chem*.  
852 38: 1114–1124.
- 853 80. Huang, J., and A.D. MacKerell. 2013. CHARMM36 all-atom additive protein force  
854 field: validation based on comparison to NMR data. *J Comput Chem*. 34: 2135–2145.
- 855 81. Lomize, M.A., I.D. Pogozheva, H. Joo, H.I. Mosberg, and A.L. Lomize. 2012. OPM  
856 database and PPM web server: resources for positioning of proteins in membranes.  
857 *Nucleic Acids Res.* 40: D370-376.
- 858 82. Campbell, S.D., K.J. Regina, and E.D. Kharasch. 2014. Significance of lipid  
859 composition in a blood-brain barrier-mimetic PAMPA assay. *J Biomol Screen*. 19: 437–  
860 444.
- 861 83. Phillips, J.C., R. Braun, W. Wang, J. Gumbart, E. Tajkhorshid, E. Villa, C. Chipot, R.D.  
862 Skeel, L. Kalé, and K. Schulten. 2005. Scalable molecular dynamics with NAMD. *J.*  
863 *Comput. Chem.* 26: 1781–1802.

- 864 84. Darden, T., D. York, and L. Pedersen. 1993. Particle mesh Ewald: An N·log(N) method  
865 for Ewald sums in large systems. *The Journal of Chemical Physics*. 98: 10089–10092.
- 866 85. Schlitter, J., M. Engels, and P. Krüger. 1994. Targeted molecular dynamics: a new  
867 approach for searching pathways of conformational transitions. *J Mol Graph*. 12: 84–89.
- 868 86. Abraham, M.J., T. Murtola, R. Schulz, S. Páll, J.C. Smith, B. Hess, and E. Lindahl.  
869 2015. GROMACS: High performance molecular simulations through multi-level  
870 parallelism from laptops to supercomputers. *SoftwareX*. 1–2: 19–25.
- 871 87. Roe, D.R., and T.E. Cheatham. 2013. PTRAJ and CPPTRAJ: Software for Processing  
872 and Analysis of Molecular Dynamics Trajectory Data. *J. Chem. Theory Comput*. 9:  
873 3084–3095.
- 874 88. Case, D.A., T.E. Cheatham, T. Darden, H. Gohlke, R. Luo, K.M. Merz, A. Onufriev, C.  
875 Simmerling, B. Wang, and R.J. Woods. 2005. The Amber biomolecular simulation  
876 programs. *J Comput Chem*. 26: 1668–1688.
- 877 89. Trott, O., and A.J. Olson. 2010. AutoDock Vina: improving the speed and accuracy of  
878 docking with a new scoring function, efficient optimization and multithreading. *J*  
879 *Comput Chem*. 31: 455–461.
- 880 90. Seeliger, D., and B.L. de Groot. 2010. Ligand docking and binding site analysis with  
881 PyMOL and Autodock/Vina. *J. Comput. Aided Mol. Des*. 24: 417–422.
- 882 91. Smart, O.S., J.G. Neduvilil, X. Wang, B.A. Wallace, and M.S.P. Sansom. 1996. HOLE:  
883 A program for the analysis of the pore dimensions of ion channel structural models.  
884 *Journal of Molecular Graphics*. 14: 354–360.
- 885 92. Kim, S., J. Lee, S. Jo, C.L. Brooks, H.S. Lee, and W. Im. 2017. CHARMM-GUI ligand  
886 reader and modeler for CHARMM force field generation of small molecules. *J Comput*  
887 *Chem*. 38: 1879–1886.
- 888 93. Humphrey, W., A. Dalke, and K. Schulten. 1996. VMD: visual molecular dynamics. *J*  
889 *Mol Graph*. 14: 33–38, 27–28.
- 890 94. Ester, M., H.-P. Kriegel, J. Sander, and X. Xu. 1996. A Density-based Algorithm for  
891 Discovering Clusters a Density-based Algorithm for Discovering Clusters in Large  
892 Spatial Databases with Noise. In: *Proceedings of the Second International Conference*  
893 *on Knowledge Discovery and Data Mining*. Portland, Oregon: AAAI Press. pp. 226–  
894 231.
- 895 95. Yamashita, A., S.K. Singh, T. Kawate, Y. Jin, and E. Gouaux. 2005. Crystal structure of  
896 a bacterial homologue of Na<sup>+</sup>/Cl<sup>-</sup>-dependent neurotransmitter transporters. *Nature*. 437:  
897 215–223.
- 898 96. Amadei, A., A.B.M. Linssen, and H.J.C. Berendsen. 2004. Essential dynamics of  
899 proteins. *Proteins: Structure, Function, and Bioinformatics*. 17: 412–425.
- 900 97. Cain, N.E., and C.A. Kaiser. 2011. Transport activity-dependent intracellular sorting of  
901 the yeast general amino acid permease. *Mol Biol Cell*. 22: 1919–1929.

902 98. Ghaddar, K., E.-M. Krammer, N. Mihajlovic, S. Brohée, B. André, and M. Prévost.  
903 2014. Converting the Yeast Arginine Can1 Permease to a Lysine Permease. *J Biol*  
904 *Chem.* 289: 7232–7246.

905

## 906 **Figure captions**

907 Fig.1: Homology structure of xCT in A. inward facing occluded state Model\_Cioc; and B.  
908 outward facing state: Model\_Cout. The transmembrane helices are marked and the five helices  
909 forming probable translocation channel are shown colored. The intracellular loop IL23 is also  
910 shown.

911

912 Fig.2: Principal Component Analysis. A. 2D scatterplots of first three eigenvectors as the  
913 trajectories are projected onto combined trajectory of TMD simulations runs. Blue color dots  
914 correspond to TMD cycle I as transition from Model\_Cioc to Model\_Cout, and red color  
915 triangles corresponds to TMD cycle II as transition from Model\_Cout to Model\_Cioc. B. Root  
916 mean square fluctuations observed for C atom of each residue along the first eigenvector (PC1).  
917 Black dots correspond to cycle I and red triangles corresponds to cycle II.

918

919 Fig. 3. Representative structures as obtained from kmeans clustering of all the conformations  
920 obtained during all TMD simulations. The values in percentages show the fraction of  
921 conformations forming the cluster corresponding to the respective structures.

922

923 Fig. 4. Scatter plots depicting clustering of ligand docked conformations. A. Clustering of  
924 conformations docked with anionic cystine, with optimal eps value of 0.075 and minimum  
925 points of 50. B. Clustering of conformations docked with glutamate with eps value of 0.07 and  
926 minimum points of 50. xCT structures best fit to the centroids of clusters are shown alongside.  
927 The helices are colored as in Fig. 1, and the ligands are shown in spheres. The outliers are shown  
928 as grey spheres.

929

930 Fig. 5. Scatter plots depicting clustering of xCT conformations docked with both cystine and  
931 glutamate; with optimal eps values of 0.65 and minimum points of 50. xCT structures best fit  
932 to the centroids of clusters are shown alongside. The helices are colored as in Fig. 1, and the  
933 ligands are shown in spheres. The outliers are shown as grey spheres.

934

935 Fig. 6. Interactions of ligands with the transmembrane helices. TM helices 11 and 12 are  
936 omitted as they do not interact with ligands. Residues that do not interact at all with the ligands  
937 are in white circles, and other residues are in colored circles depending on the frequency of  
938 their interaction with the ligand. The legend indicates the color corresponding to the frequency  
939 of occurrence of interaction observed for all the docked conformations.

940

941 Fig. 7. Number of water molecules observed within the translocation channel of ligand docked  
942 xCT conformations. Blue colored circles denote water molecules for glutamate-only docked  
943 xCT conformations, red colored triangles denote water molecules for cystine-only docked xCT  
944 conformations, and black stars denote water molecules for both glutamate and cystine docked  
945 xCT conformations.

946
